# Supplementary material for: Importance of Poly-3-Hydroxybutyrate Metabolism to the Ability of Herbaspirillum seropedicae To Promote Plant Growth
Source: PubMed Central journal article supplement (PMC6414382; doi:10.1128/aem.02586-18), 2019-03-06
Supplement: AEM.02586-18-s0001.pdf [file AEM.02586-18-s0001.pdf]

**SUPPLEMENTARY DATA**

**FIG. S1.** Multiple alignments of protein sequences of (A) PhaZ1 from *H. seropedicae* SmR1 (Hsero\_1622) against PhaZ1a1 from *R. eutropha* H16 (A1150) and (B) PhaZ2 from *H. seropedicae* SmR1 (Hsero\_0639) against PhaZ2a2 from *R. eutropha* (A2862) were carried out using Clustal Omega and the default parameters (1). The asterisks (\*) indicate fully conserved residues, while colons (:) indicate conservation in residues of strongly similar properties and points (.) indicate conservation in residues of weakly similar properties.

|          |                                                                 |     |  |
|----------|-----------------------------------------------------------------|-----|--|
| <b>A</b> |                                                                 |     |  |
| PhaZ1    | MLYQLHELNRAF LNPMMQWAETSAKLFSDPVSLAHTPFQSQRIAAGYELLYRLSKEYEKP   | 60  |  |
| PhaZ1a1  | MLYQLHEFQRSILHPLTAWAQATAKTFNPLSPLSLVPGAPRLAAGYELLYRLGKEYEKP     | 60  |  |
|          | *****:.*:.*:* **::** *:.*:***: .* : *.*****.*****               |     |  |
| PhaZ1    | QFNIDAVPVDGKSVGIVEEVVEEKPFCLRHFRKDLRSARQAT--ALKQPTVLVWAPLSGH    | 118 |  |
| PhaZ1a1  | AFDIKSVRSNGRDIPIVEQTVLEKPFCKLVRFKRYADDPETIKLLKDEPVVLAAPLSGH     | 120 |  |
|          | *.*:* *:*:* **:* * **:*:*:*: . . : : .*.***.*****               |     |  |
| PhaZ1    | HSTLLRETVRALLQEHDVYITDWDARMPVEEQGAFHLHDYVYVQDFIRTLGP-DVHVI      | 177 |  |
| PhaZ1a1  | HATLLRDTVRTLLQDQHKVYVTDWIDARMPVEEGAFHLSDYIYYIQEFIRHIGAENLHVI    | 180 |  |
|          | *.****.***.***.* *.*.*** *****.***** **.*.*.*.*** .* :.***      |     |  |
| PhaZ1    | SVCQPTVPVLAAILMASANDPMLPKSMTMMGGPIDARKSPTAVNDLATEKPYSWFENTV     | 237 |  |
| PhaZ1a1  | SVCQPTVPVLAAILMASAGE-KTPRTMTMMGGPIDARKSPTAVNSLATNKSFEWFENNV     | 239 |  |
|          | *****.*****.: *.:*****.*****.***.* :.***.*                      |     |  |
| PhaZ1    | IYSVPANYPGFRKVPYVPGFLQHAGFVAMNPRRHAQSHWDFYMHLDGDDASAEHRKFYD     | 297 |  |
| PhaZ1a1  | IYTPANYPGHRRVYPGFLQHAGFVAMNDRHLSHYDFYLSLVEGDADDAEHRVRYD         | 299 |  |
|          | *.*.*****.*.:*****.***** ** .*.***: * :** .** * :***            |     |  |
| PhaZ1    | EYNAVLDMPAEFYLETIKVVFQDFNLARGTWEIEGQVLRPQDIKSVALFTIEGELDDISG    | 357 |  |
| PhaZ1a1  | EYNAVLDMAEYVLDTIREVFQEFRLANGTWAIDGNPVRPQDIKSTALMTVEGELDDISG     | 359 |  |
|          | ***** **.*.*.*: **.*.*.*** *.*: *****.*.*:*****                 |     |  |
| PhaZ1    | SGQTQAAQELCCSIPKARKQHTVPKAGHYGIFSGRRWREIVCPKIGEFIRANA-----      | 411 |  |
| PhaZ1a1  | AGQTAAAHDLCAIGPKIRKQHLNAACHGHYGFSGRRWREEIYVQLRDFIRKYHQASATR     | 419 |  |
|          | :** *.:*.*:*** **:*.*. :.***** : *.: :***                       |     |  |
| <b>B</b> |                                                                 |     |  |
| PhaZ2    | MIPTYQLYQNYADATDPLRACARMAQALGATWPGIPVHPYWRKMASACEVFARTQLTHA     | 60  |  |
| PhaZ2a2  | --MLYHAYQIYADMI LPACTLAE LAEAATLAA-NPRSGGFDAVPRLRAACELIALVRLTHH | 57  |  |
|          | *. ** *** * :.*: *.* * . :.:***:* :.***                         |     |  |
| PhaZ2    | RPPFGIATVEEGCTISVHEEEIHATPFCGLLHFRKDSATVQPKVLVWAPMSGHFATLLR     | 120 |  |
| PhaZ2a2  | RPAFGIDHATVGGQVPVTEEVVARTPFCSLLHFRRHGIVGQPRVLLVAPMSGHFATLLR     | 117 |  |
|          | ** *** . * : * ** : **.*.***:.. . **.*:*****                    |     |  |
| PhaZ2    | GTVRTLLRDHDVYITDWRNARDVATAHGRFGLDEYVSHIIDFLGVLGPGAHLAVCQPTV     | 180 |  |
| PhaZ2a2  | GTVQTMLADHDVYITDWHNPRDIPLLAGRFGDFVQHLIGFLQTLGGGTHLVAICQPAV      | 177 |  |
|          | ***.*.* *****.***.* ** : **.*.*.*.* ** *.*.*:***.*              |     |  |
| PhaZ2    | AALTAAVMAADGHPAQPRSMTLMAGPIDTRVNPTAVNALAKSKPIAWFEKNMISTVPAR     | 240 |  |
| PhaZ2a2  | AALAAALMAEDGPAQPPSLTLMAGPIDARVNPTKVNALAMSQPLEWFERTLIGMVPLR      | 237 |  |
|          | ***.***.* ** *.*.* *.:*****.***** ***** *.*: **:*.*. ** *       |     |  |
| PhaZ2    | HAGAGRVPYVPGFVQLAAFMNMNLSRHVEAFGKLYHHLVDGEHARADQIKDFYEEYFAMAD   | 300 |  |
| PhaZ2a2  | FAGAMRRVYPGHVQLAFMNMNPERHEQALRELYALRERGEHDKADAIRDFYIEYFATMD     | 297 |  |
|          | .*** *****.* ** *.*.* **.*: :** **.* ** *.*.*** ** ** *         |     |  |
| PhaZ2    | LPAEFYLETVRTVFQEHALPLGKLSYAGRPVEPRAIRRTALFTIEGKDDICAVGQTLAA     | 360 |  |
| PhaZ2a2  | LTAEFYLETVSLVFQRFLLAQGLLDVSGRRVTRAIHRTALLTVEGERDDICAIQQTVA      | 357 |  |
|          | * ***** **.*.* * *.*: ** * .***.***.*:***.***.***.***.*         |     |  |
| PhaZ2    | QELCSGIRPYMRLHHVQTVAGHYGVFNRRWDNEIYPRDRDFINMHR                  | 408 |  |
| PhaZ2a2  | QDLCSSLRPYMRMHVQTVGHHYGVFNRRWETQVYPLVRNITYSS-                   | 404 |  |
|          | *.*.*.:*****.*****.*****.***:.*: *                              |     |  |

FIG. S2. Multiple alignment of protein sequences of FliA from *H. seropedicae* SmR1 (Hsero\_2029) against FliA from *E. coli* MG1655 (b1922) was carried out using Clustal Omega and the default parameters (1). The asterisks (\*) indicate fully conserved residues, while colons (:) indicate conservation in residues of strongly similar properties and points (.) indicate conservation in residues of weakly similar properties.

```

FliA_Hs      ---MYNVKGGKGGKNDLLEQHAPLVKLAHQLKAKLPPSVEVDDLIQAGMMGLLDAVNRYE      57
FliA_Ec      MNSLYTAEGVMDKHSWQRYVPLVRHEALRLQVRLPASVELDDLQAGGIGLLNAVERYD      60
              :*.:.*  .*.:.*  :.:.*.*.: * :*.:.* **:*.*.*.* :*.:*.*.*:
FliA_Hs      ETHGAQFETYAVQRIRGAMLDELRSDDLPRVSRIRQNARKVEEAMQTLLQQLGRQPKEAEL      117
FliA_Ec      ALQGTAFTTYAVQRIRGAMLDELRSRDWVPRSVRRNAREVAQAIGQLEQELGRNATETEV      120
              :* : * ***** **:*.*:*.*.*.* :*: * *.*.*: .*.:*
FliA_Hs      AQHMQISLEDYQSLLSECGGHQLIYYEDFHDDGGHEHFLDRHQTSDSDPLQNLINGGF      177
FliA_Ec      AERLGIDIADYRQMLLDTNNSQLFSYDEWREEHGDSIELVTD--DHQRENPLQQLDSNL      178
              *.:.* *.: *.*.:.* : .. **:* :*.:*.:*.*. .: : :*.*.*.:*.:*
FliA_Hs      REAVVDSIKALPEREQILMALYYEQEMNLKEIGAVMGVSESRVCQLHSQAISRMRSYLRE      237
FliA_Ec      RQRVMEAIETLPEREKLVLTLYYQEELNLKEIGAVLEVGESRVSQQLHSQAIKRLRKLKLGK      238
              *:* :*.:*:*.*.*.*.:*.:*.*.*.*.*.*.*.*.*.*.*.*.*.*.*.*.*.*
FliA_Hs      HSWGVA      244
FliA_Ec      L-----      239

```

FIG. S3. Confocal microscopy analysis of uninoculated *Setaria viridis* roots showing a low intrinsic green fluorescence. (A) Confocal GFP fluorescence image and (B) merged images of confocal fluorescence and bright field images

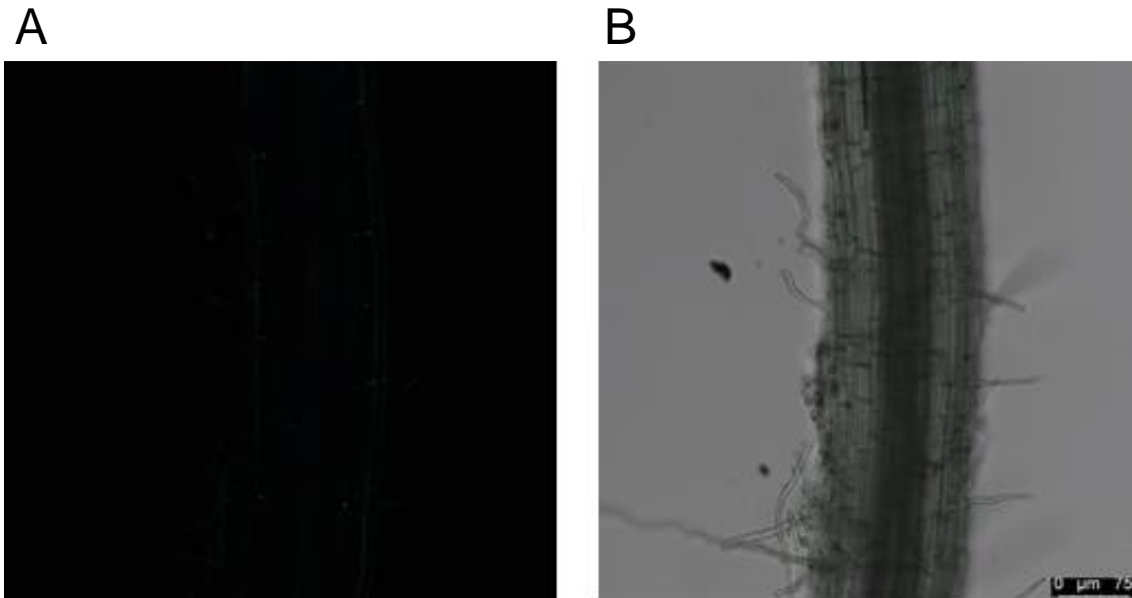

## References

1. Sievers F, Wilm A, Dineen D, Gibson TJ, Karplus K, Li W, Lopez R, McWilliam H, Remmert M, Soding J, Thompson JD, Higgins DG. 2011. Fast, scalable generation of high-quality protein multiple sequence alignments using Clustal Omega. *Mol Syst Biol* 7:539.
